# Supplementary material
Source: PubMed Central journal article supplement (PMC2745555)
Supplement: NIHMS60129-supplement-SI.pdf [file NIHMS60129-supplement-SI.pdf]

## Antimalarial Linear Lipopeptides from a Panamanian Strain of the Marine

### *Cyanobacterium Lyngbya majuscula*

Kerry L. McPhail,<sup>\*,†</sup> Jhonny Correa,<sup>‡,§</sup> Roger G. Linington,<sup>⊥,||</sup> José González,<sup>⊥</sup> Eduardo Ortega-Barría,<sup>⊥</sup> Todd L. Capson,<sup>§</sup> and William H. Gerwick<sup>§,||</sup>

*College of Pharmacy, Oregon State University, Corvallis, Oregon, 97331, Laboratory of Tropical Bioorganic Chemistry, University of Panama, Panama City, Republic of Panama, Smithsonian Tropical Research Institute, Balboa, Ancon, Republic of Panama, Instituto de Investigaciones Científicas Avanzados y Servicios de Alta Tecnología, Centro de Estudios Biomédicos, Clayton, Building 175, P.O. Box 7250, Panama 5, Republic of Panama, and Scripps Institution of Oceanography and Skaggs School of Pharmacy and Pharmaceutical Sciences, University of California San Diego, La Jolla, CA 92093.*

\* To whom correspondence should be addressed. Tel: 541 737 5808. Fax: 541 737 3999.  
E-mail: kerry.mcphail@oregonstate.edu.

<sup>†</sup> Oregon State University.

<sup>‡</sup> University of Panama.

<sup>§</sup> Smithsonian Tropical Research Institute.

<sup>⊥</sup> Instituto de Investigaciones Científicas Avanzados y Servicios de Alta Tecnología.

<sup>||</sup> University of California San Diego.

## Table of Contents

- S1.  $^1\text{H}$  NMR Spectrum for Carmabin A (**1**) in  $\text{CDCl}_3$  (600 MHz)
- S2.  $^{13}\text{C}$  NMR Spectrum for Carmabin A (**1**) in  $\text{CDCl}_3$  (100 MHz)
- S3.  $^1\text{H}$  NMR Spectrum for Dragomabin (**2**) in  $\text{CDCl}_3$  (400 MHz)
- S4.  $^{13}\text{C}$  NMR Spectrum for Dragomabin (**2**) in  $\text{CDCl}_3$  (75 MHz)
- S5.  $^1\text{H}$  NMR Spectrum for Dragonamide A (**3**) in  $\text{CDCl}_3$  (400 MHz)
- S6.  $^{13}\text{C}$  NMR Spectrum for Dragonamide A (**3**) in  $\text{CDCl}_3$  (100 MHz)
- S7.  $^1\text{H}$  NMR Spectrum for Dragonamide B (**4**) in  $\text{CDCl}_3$  (300 MHz)
- S8.  $^{13}\text{C}$  NMR Spectrum for Dragonamide B (**4**) in  $\text{CDCl}_3$  (75 MHz)
- S9. Two potential diastereomers for the 2,4-dimethyldecynoic acid units in Carmabin A (**1**).
- S10. Table of  $^{13}\text{C}$  and  $^1\text{H}$  NMR Data in  $\text{CDCl}_3$  for Dragonamide A (**3**).

7.68  
7.26  
7.24  
7.23  
7.18  
7.17  
7.11  
7.10  
7.06  
7.05  
6.96  
6.94  
6.93  
6.84  
6.83  
6.81  
6.80  
6.18  
5.55  
5.52  
5.39  
5.35  
5.34  
4.81  
4.80  
4.78  
4.58  
3.77  
3.27  
3.17  
3.02  
3.00  
2.97  
2.95  
2.92  
2.90  
2.88  
2.75  
2.60  
2.59  
2.24  
2.15  
2.14  
1.95  
1.42  
1.24  
1.21  
1.19  
1.19  
1.18  
1.11  
1.10  
1.08  
1.07  
1.05  
1.02  
1.01  
1.00  
0.99  
0.93  
0.87  
0.69  
0.68  
0.49  
0.48

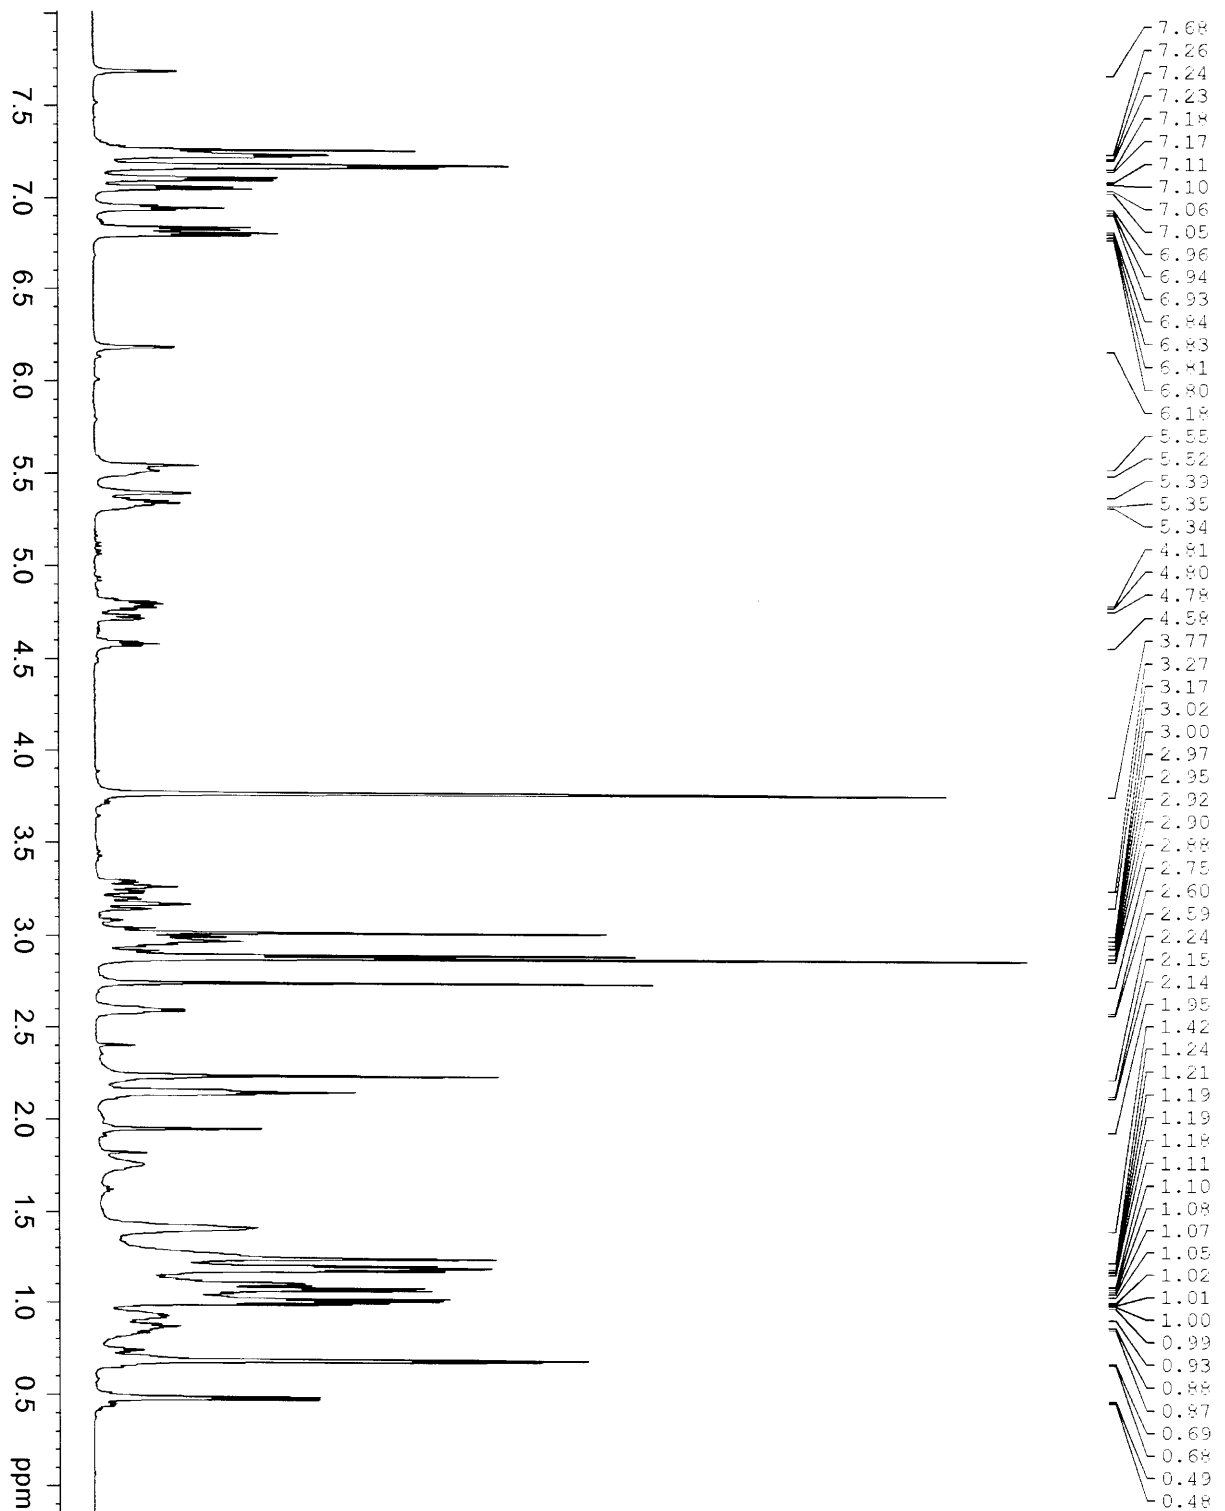

Current Data Parameters  
NAME Kml440HAE1  
EXPNO 100  
PROCNO 1

F2 - Acquisition Parameters  
Date\_ 20040227  
Time 12.18  
INSTRUM spect  
PROBHD 5 mm Multinucl  
PULPROG zg30  
TD 32768  
SOLVENT CDCl3  
NS 16  
DS 2  
SWH 8389.262 Hz  
FIDRES 0.256020 Hz  
AQ 1.9530228 sec  
RG 128  
DE 59.600 usec  
TE 300.0 K  
D1 2.00000000 sec

===== CHANNEL f1 =====  
NUC1 1H  
P1 9.50 usec  
PL 0.00 dB  
SFO1 600.0389002 MHz

F2 - Processing parameters  
SI 8192  
SF 600.0350156 MHz  
WDW EM  
SSB 0  
LB 0.30 Hz  
GB 0  
PC 1.00

S1. <sup>1</sup>H NMR Spectrum for Carmabin A (1) in CDCl<sub>3</sub> (600 MHz)

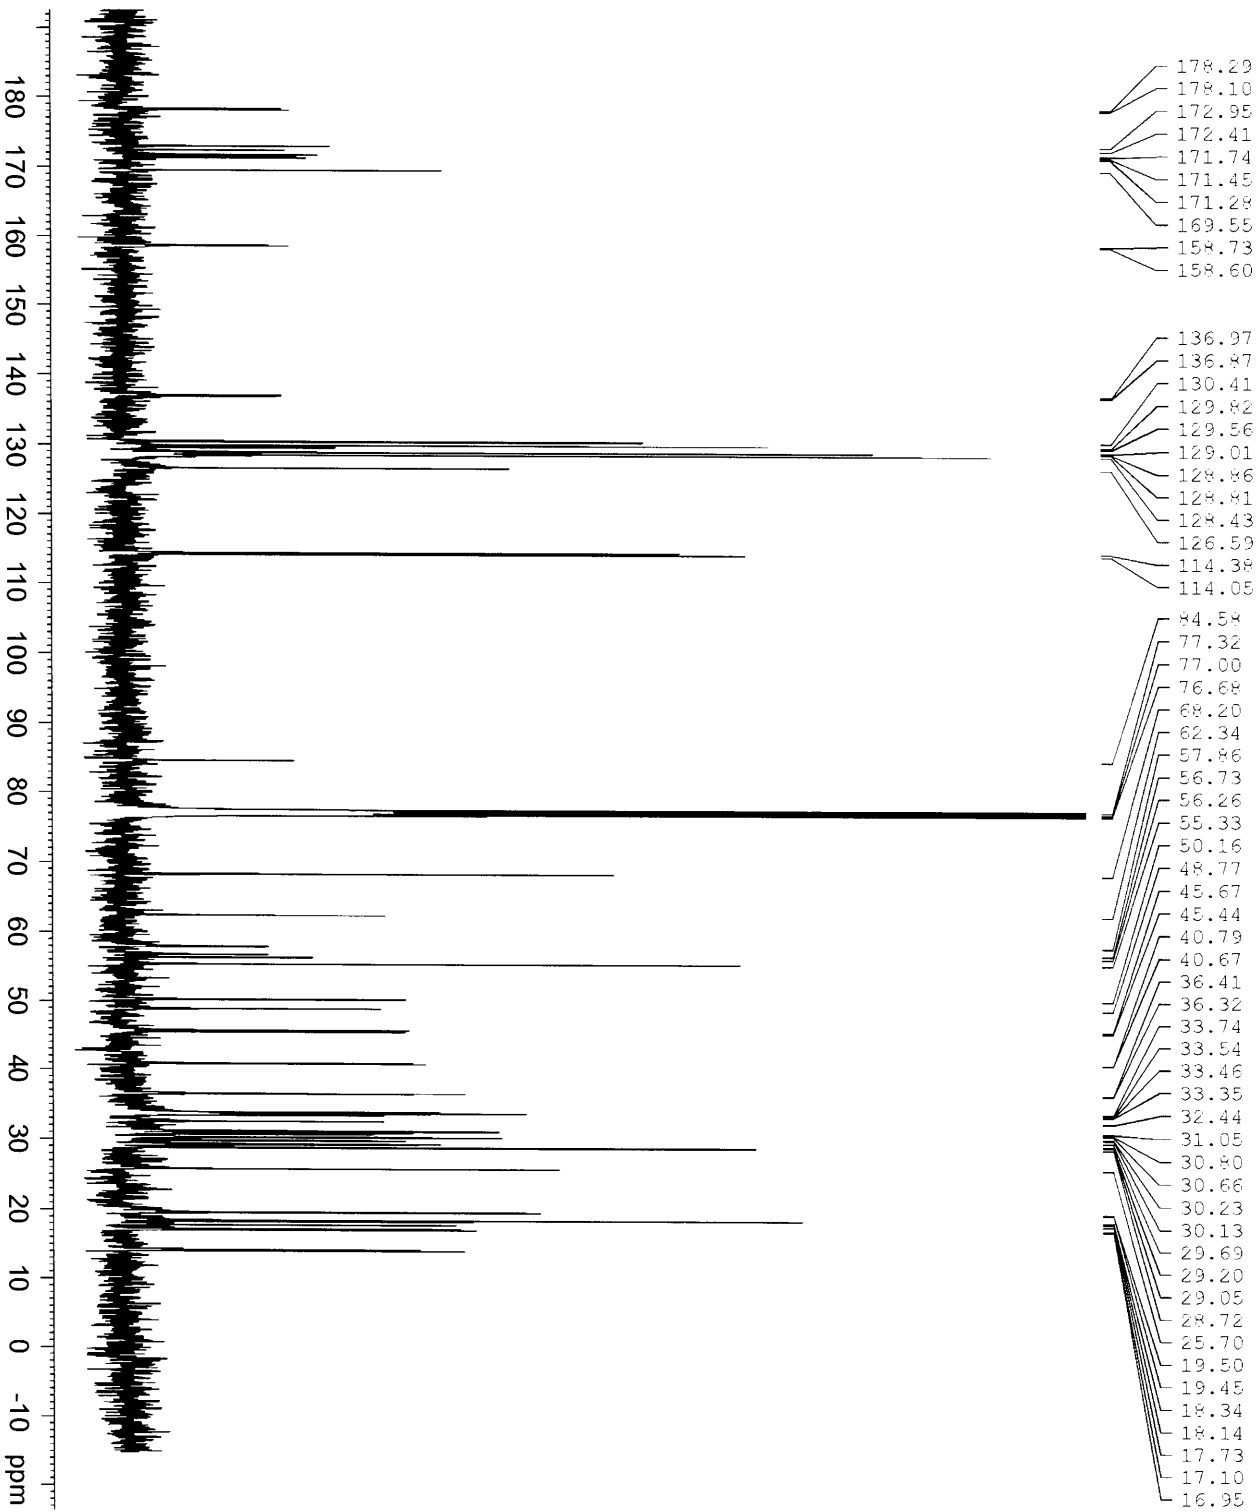

S2. <sup>13</sup>C NMR Spectrum for Cammabin A (1) in CDCl<sub>3</sub> (100 MHz)

```

Current Data Parameters
NAME          km144014E1b
EXPNO         3
PROCNO        1

F2 - Acquisition Parameters
Date_         20040306
Time          0.02
INSTRUM       cpX400
PROBHD        5 mm BBO Z-G
PULPROG       zgpg30
TD            65536
SOLVENT       CDCl3
NS            8000
DS            4
SWH           25125.629 Hz
FIDRES        0.383387 Hz
AQ            1.3042164 sec
RG            4096
DE            19.900 usec
TE            300.0 K
D1            0.00300000 sec
D11           0.03000000 sec
D12           0.00002000 sec

===== CHANNEL f1 =====
NUC1          13C
P1            7.50 usec
PL1           -3.00 dB
SFO1         100.5936186 MHz

===== CHANNEL f2 =====
CPDPRG2       waltz16
NUC2          1H
PCPDZ         80.00 usec
PL2           0.00 dB
PL12         17.40 dB
PL13         18.00 dB
SFO2         400.0116000 MHz

F2 - Processing parameters
SI            65536
SF           100.5825982 MHz
WDW           EM
SSB           0
LB            3.00 Hz
GB            0
PC            1.40
  
```

Current Data Parameters  
 NAME Kai1000241  
 EXNO 100  
 PROCNO 1  
 P2 - Acquisition Parameters  
 Time 19.13  
 INSTRUM dpm400  
 PROBRD 5 mm BBO Z-G  
 PULPROG zgpg30  
 SOLVENT CDCl3  
 NS 32  
 DS 2  
 SWH 574.7126 Hz  
 FIDRES 0.4102661 Hz  
 AQ 2.4102661 sec  
 RG 456.1  
 DW 87.000 usec  
 DE 6.00 usec  
 TE 300.0 K  
 D1 1.00000000 sec  
 CHANNEL F1  
 NUC1 1H  
 P1 11.30 usec  
 PL 0.00 dB  
 SFO1 400.012601 MHz  
 F2 - Processing parameters  
 SI 65536  
 SF 400.0100148 MHz  
 HF 0  
 SSF 0  
 LB 0.70 Hz  
 GB 0  
 PC 0.90

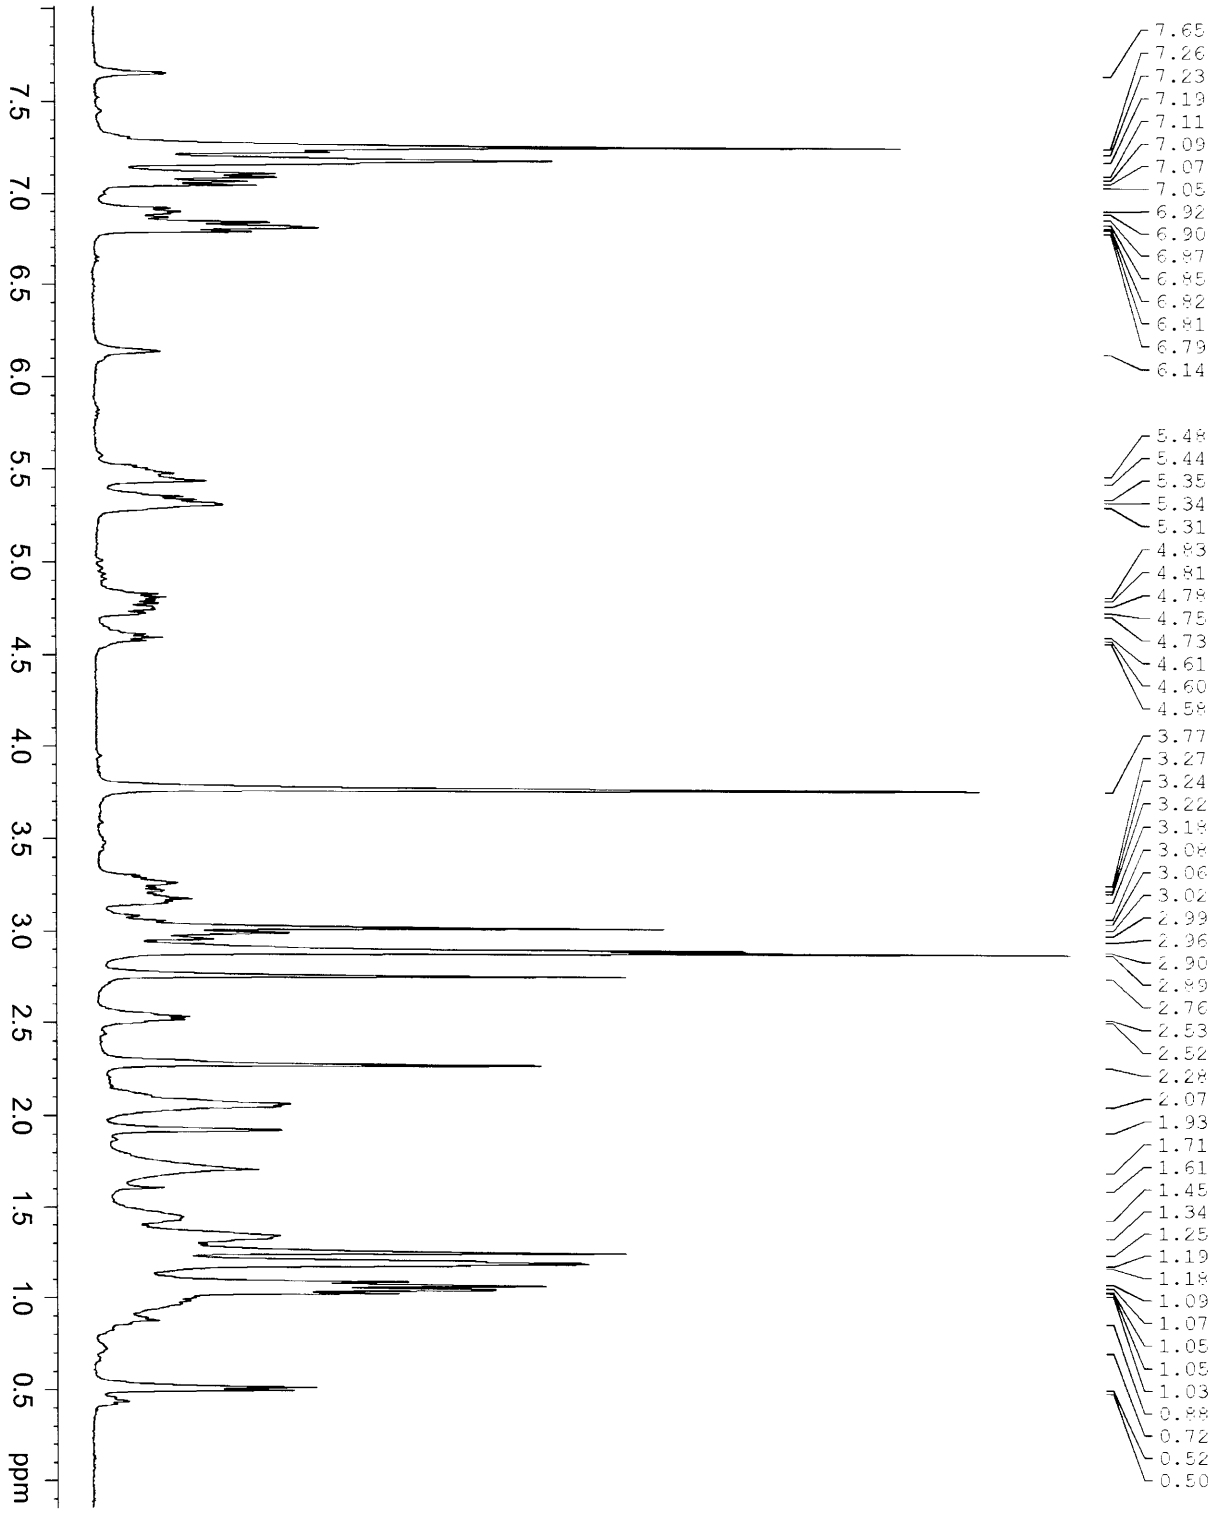

S3. <sup>1</sup>H NMR Spectrum for Dragomabin (2) in CDCl<sub>3</sub> (400 MHz)

S4. <sup>13</sup>C NMR Spectrum for Dragomabin (2) in CDCl<sub>3</sub> (75 MHz)

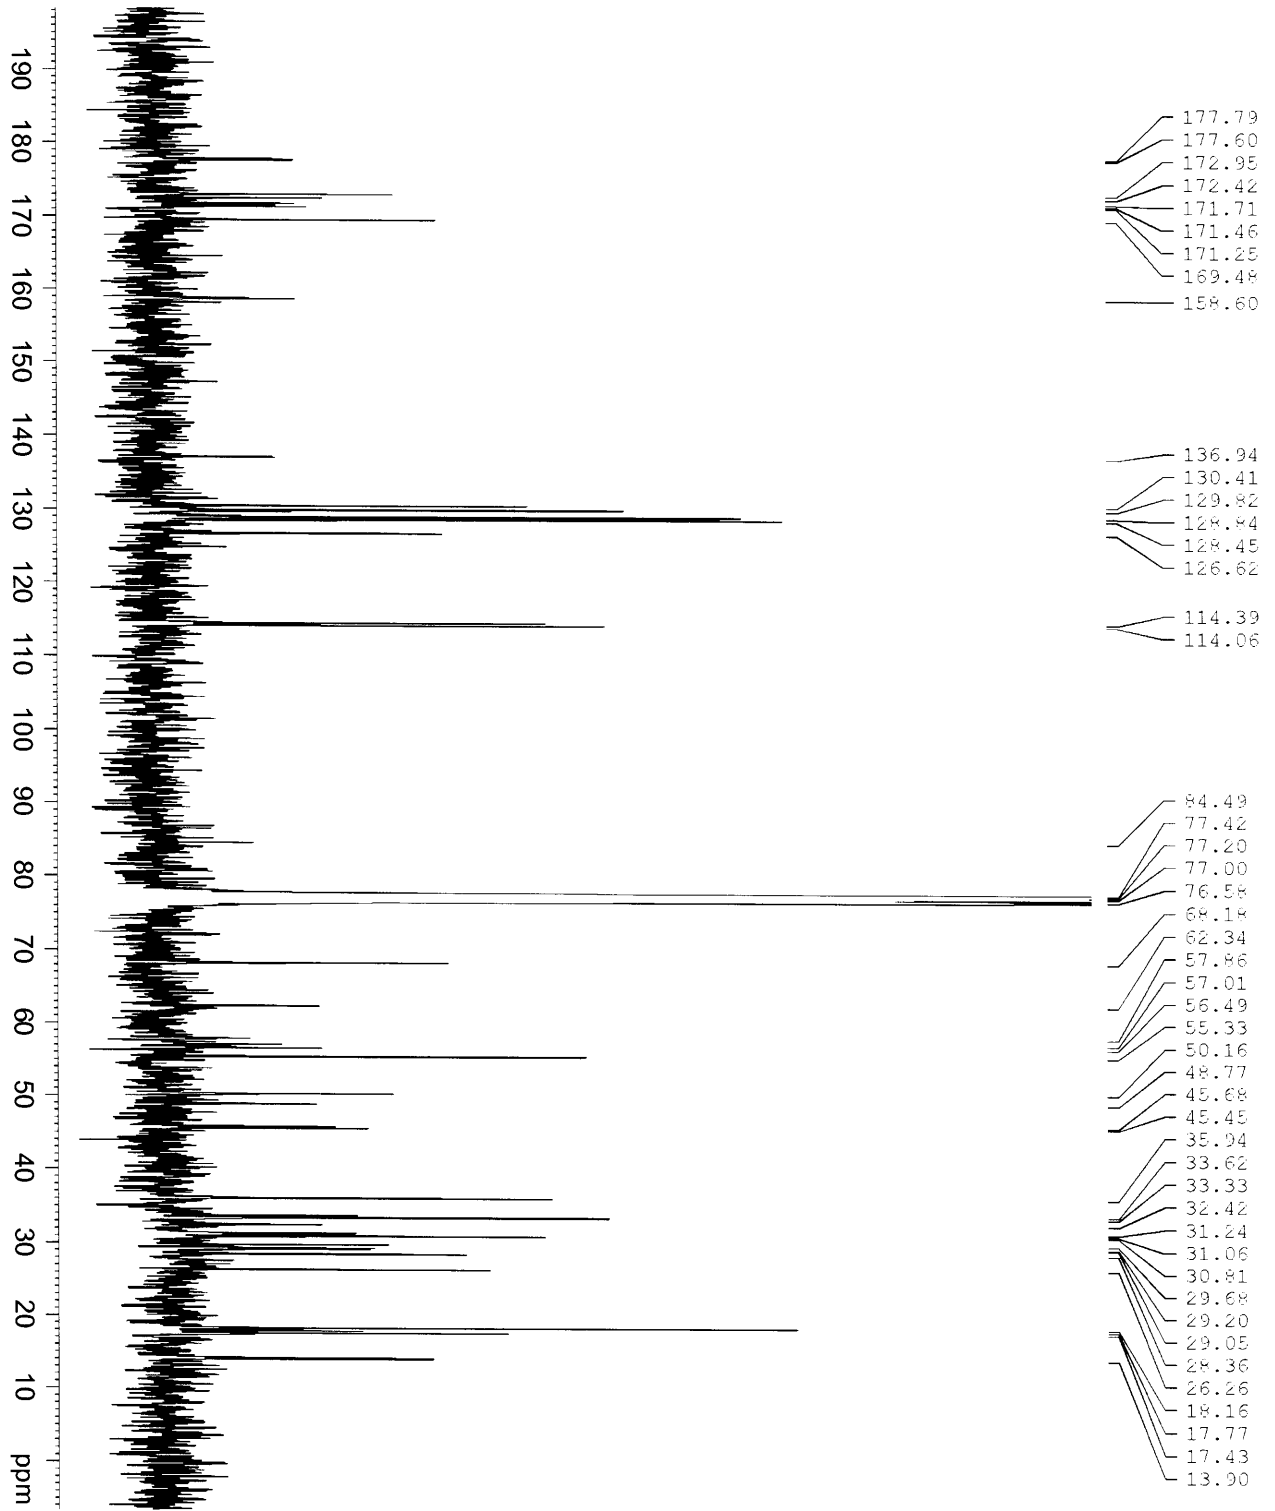

```

Current Data Parameters
NAME      Km140H2A1
EXPNO    101
PROCNO    1

F2 - Acquisition Parameters
Date_     20021205
Time      19.17
INSTRUM   dxp300
PROBHD    5 mm QNP 1H
PULPROG   zgpg30rep.1k
TD         65536
SOLVENT   NS
NS         21462
DS         2
SWH        18832.393 Hz
FIDRES     0.287360 Hz
AQ         1.7400308 sec
RG         8192
DM         26.550 usec
DE         6.00 usec
TE         300.0 K
D1         0.00300000 sec
D11        0.03000000 sec
D12        0.00020000 sec
I2         45

=====
CHANNEL F1
NUC1       13C
P1         7.60 usec
PL1        -3.00 dB
SFO1       75.4756431 MHz

=====
CHANNEL F2
CPDPRG2   waltz16
NUC2       1H
PCPD2     80.00 usec
PL2        2.00 dB
PL12       17.55 dB
PL13       19.00 dB
SFO2       300.1315007 MHz

F2 - Processing parameters
SI         131072
SF         75.4677505 MHz
WDW        EM
SSB        0
LB         3.00 Hz
GB         0
PC         1.40
  
```

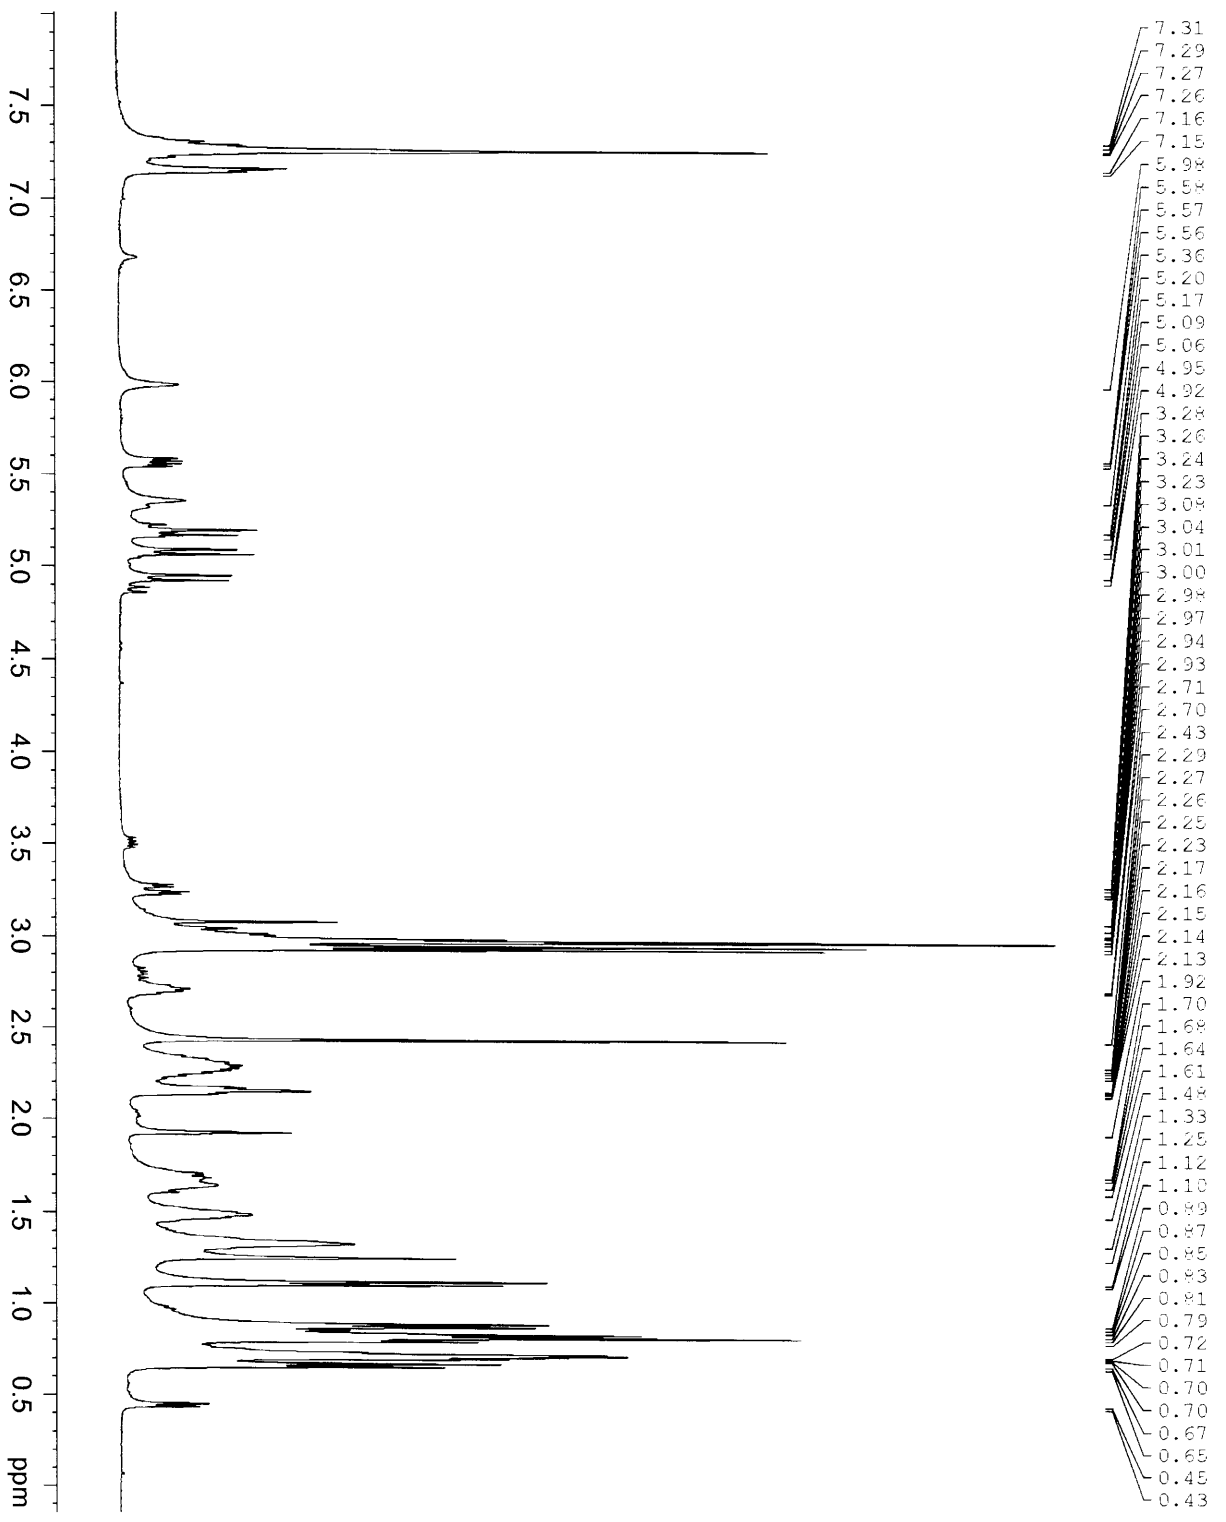

7.31  
7.29  
7.27  
7.26  
7.16  
7.15  
5.98  
5.98  
5.98  
5.57  
5.56  
5.36  
5.20  
5.17  
5.09  
5.06  
4.95  
4.92  
3.28  
3.26  
3.24  
3.23  
3.08  
3.04  
3.01  
3.00  
2.98  
2.97  
2.94  
2.93  
2.71  
2.70  
2.43  
2.29  
2.27  
2.26  
2.25  
2.23  
2.17  
2.16  
2.15  
2.14  
2.13  
1.92  
1.70  
1.68  
1.64  
1.61  
1.48  
1.33  
1.25  
1.12  
1.10  
0.99  
0.97  
0.93  
0.91  
0.81  
0.79  
0.72  
0.71  
0.70  
0.67  
0.65  
0.47  
0.4

```

Current Data Parameters
NAME          Km1400G25
EXPNO         100
PROCNO        1

F2 - Acquisition Parameters
Date_         20021120
Time          22.23
INSTRUM      dpx400
PROBHD       5 mm BBO-Z-G
PULPROG      zg30
TD           32768
SOLVENT      CDCl3
NS           32
DS           2
SWH          5995.204 Hz
FIDRES       0.182959 Hz
AQ           2.7329011 sec
RG           228.1
DE           83.400 usec
TE           300.0 K
D1           1.00000000 sec

===== CHANNEL f1 =====
NUC1          1H
P1           11.30 usec
PL1          0.00 dB
SFO1         400.0126001 MHz

F2 - Processing parameters
SI           65536
SF           400.0100142 MHz
WDW          EM
SSB          0
GB           0
PC           1.00
  
```

S5. <sup>1</sup>H NMR Spectrum for Dragonamide A (3) in CDCl<sub>3</sub> (400 MHz)

176.81  
 171.78  
 171.30  
 170.77  
 169.69

136.67  
 129.37  
 128.88  
 128.69  
 128.63  
 126.98

84.19  
 77.32  
 77.00  
 76.68

68.36

58.45  
 57.89  
 56.33  
 36.18  
 33.57  
 33.20  
 30.66  
 30.36  
 30.20  
 29.69  
 28.39  
 27.12  
 27.07  
 26.99  
 26.78  
 20.04  
 19.66  
 19.49  
 18.28  
 17.95  
 17.68  
 17.38

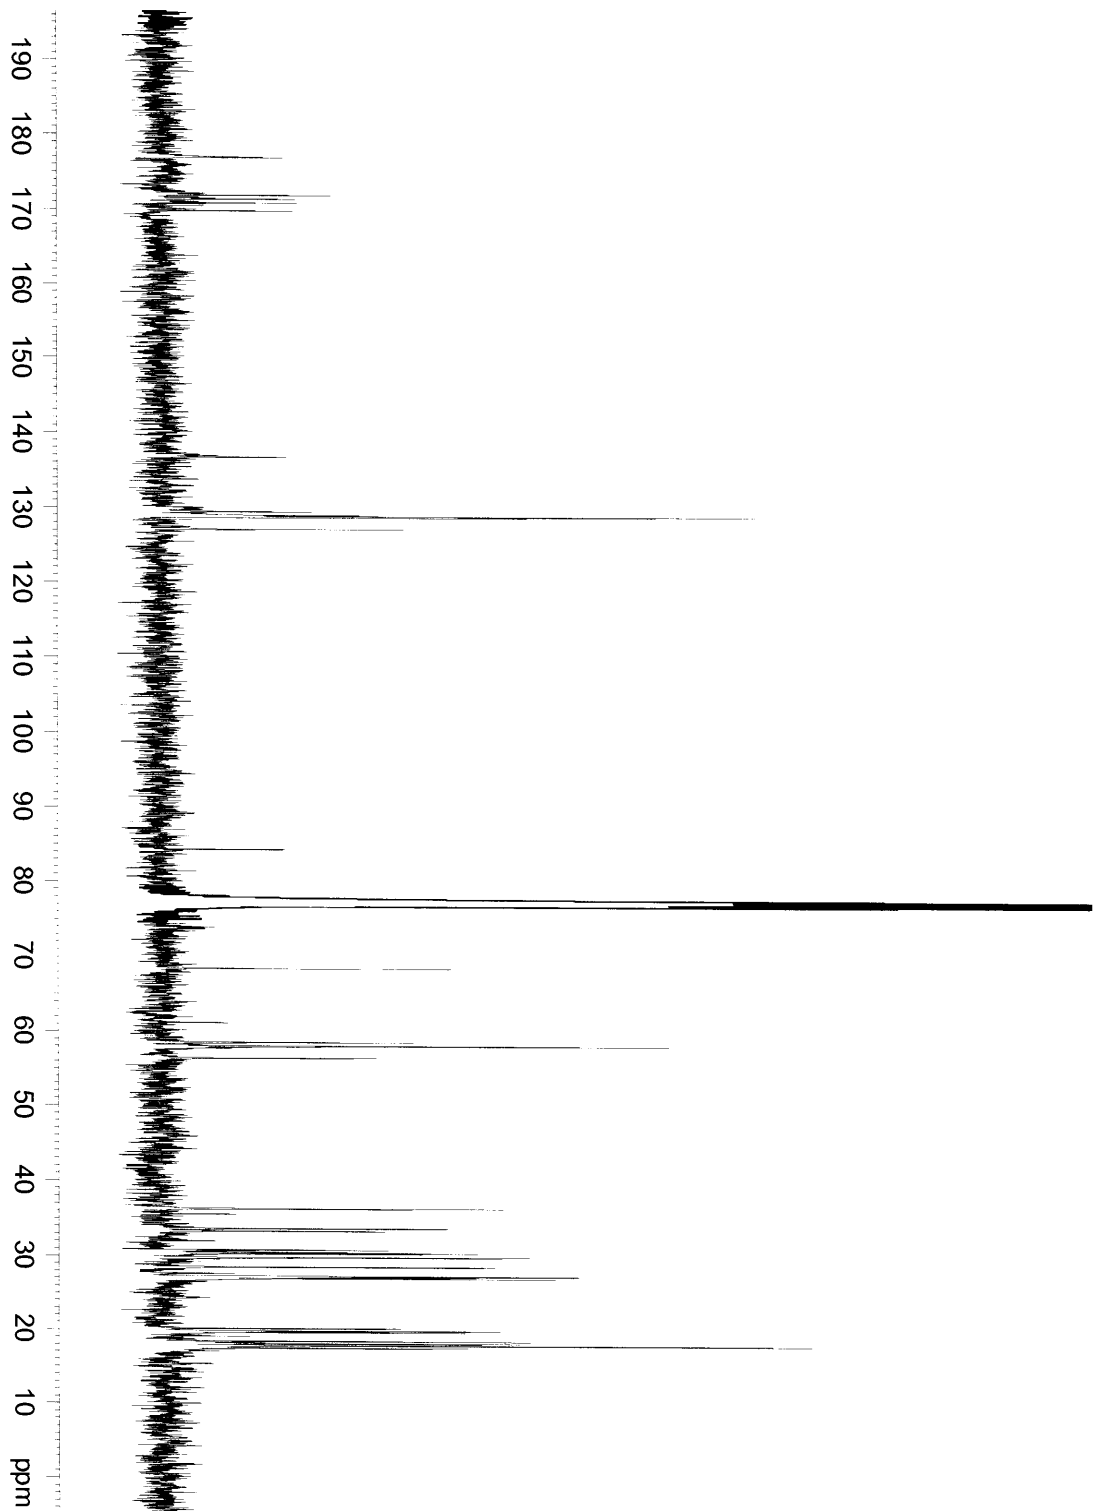

S6. <sup>13</sup>C NMR Spectrum for Dragonamide A (3) in CDCl<sub>3</sub> (100 MHz)

```

Current Data Parameters
NAME          Km140052D
EXPNO        101
PROCNO       1

F2 - Acquisition Parameters
Date_        20021120
Time         22.32
INSTRUM      dpq400
PROBHD       5 mm BBO-Z-G
PULPROG      zgpg30
ID           65536
SOLVENT      Pyr
NS           4520
DS           4
SWH          25125.629 Hz
FIDRES       0.383387 Hz
AQ           1.3042164 sec
RG           1024
DE           19.900 usec
TE           300.0 K
D1           0.00300000 sec
D11          0.03000000 sec
D12          0.00002000 sec

===== CHANNEL f1 =====
NUC1         13C
P1           7.50 usec
PL1         -3.00 dB
SFO1        100.5936186 MHz

===== CHANNEL f2 =====
CPDPRG2     waltz16
NUC2         1H
PCPD2       80.00 usec
PL2         0.00 dB
PL12        17.40 dB
PL13        18.00 dB
SFO2        400.0116000 MHz

F2 - Processing parameters
SI           65536
SF           100.5825985 MHz
WDW          EM
SSB          0
LB           3.00 Hz
GB           0
PC           1.40
  
```



7.26  
7.14  
6.01  
5.30  
5.26  
5.23  
5.19  
5.16  
4.59  
4.55  
4.35  
4.32  
4.22  
3.22  
3.05  
3.03  
3.03  
2.99  
2.97  
2.72  
2.70  
2.68  
2.45  
2.38  
2.35  
2.34  
2.33  
2.32  
2.30  
2.26  
2.24  
2.22  
2.18  
2.17  
2.16  
2.15  
2.14  
2.13  
1.93  
1.92  
1.92  
1.74  
1.71  
1.69  
1.65  
1.60  
1.49  
1.47  
1.45  
1.39  
1.35  
1.34  
1.25  
1.13  
1.11  
1.04  
1.02  
1.00  
0.99  
0.97  
0.90  
0.88  
0.84  
0.81  
0.77  
0.75  
0.73

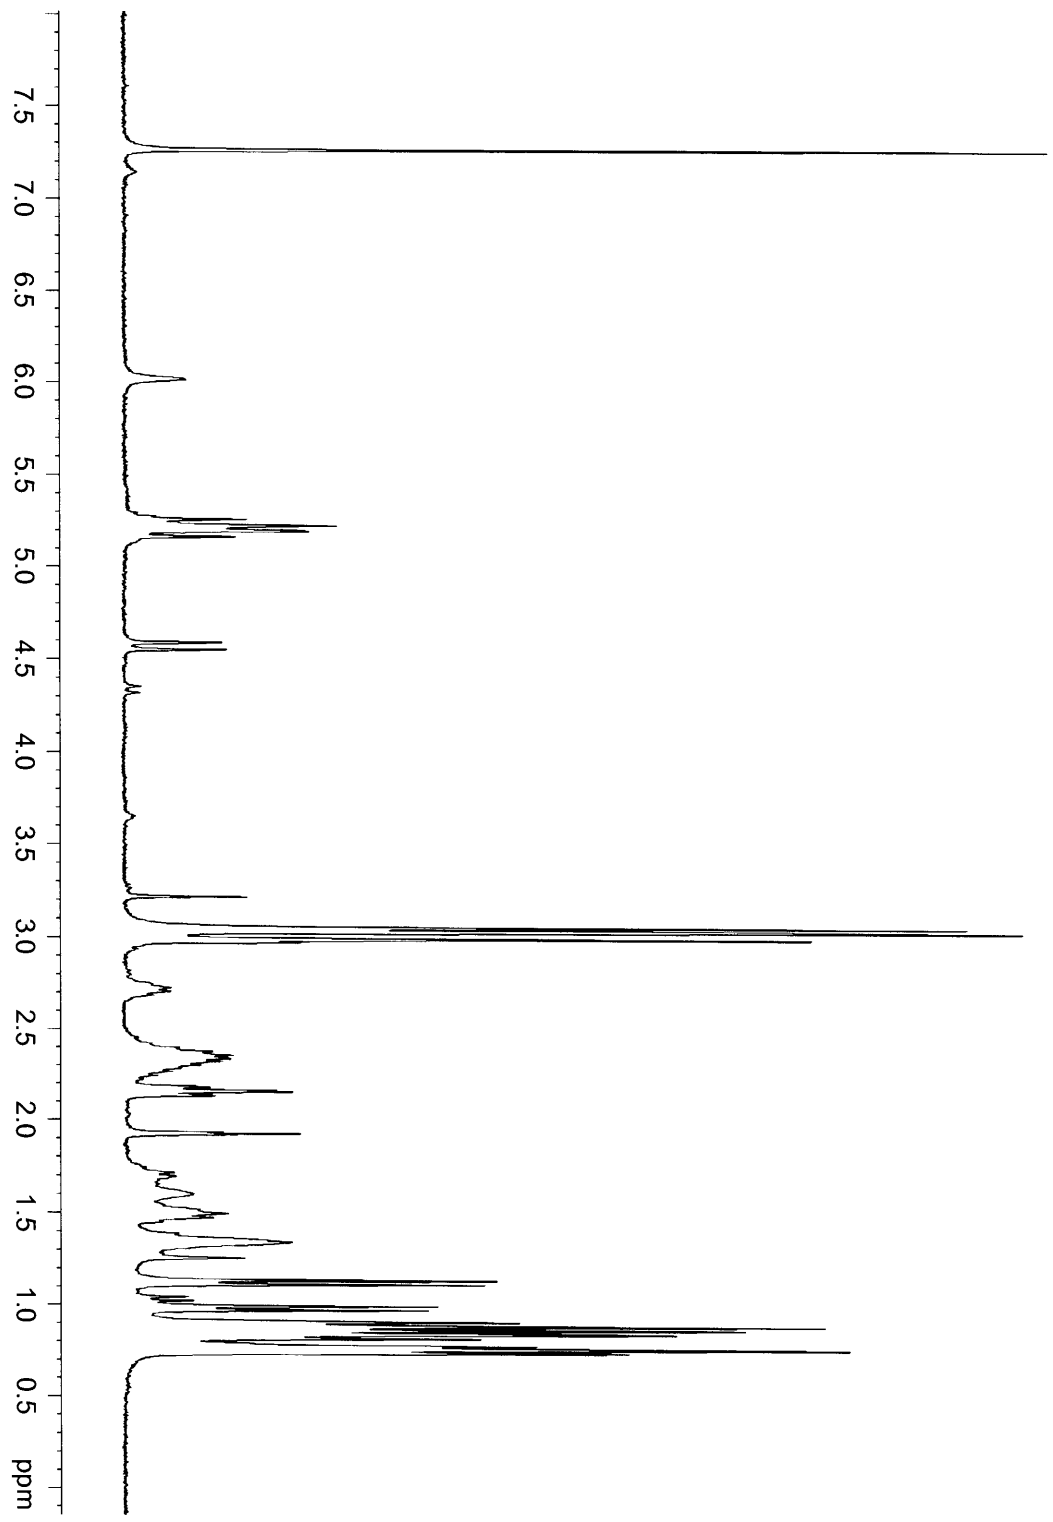

S7. <sup>1</sup>H NMR Spectrum for Dragonamide B (4) in CDCl<sub>3</sub> (300 MHz)

Current Data Parameters  
NAME 1455G9  
EXPNO 100  
PROCNO 1

F2 - Acquisition Parameters  
Date\_ 20041020  
Time 11.01

INSTRUM spect  
PROBHD 5 mm BBO BB/2H  
PULPROG zg30  
TD 65536  
SOLVENT CDCl3

NS 20  
DS 4  
SWH 4496.403 Hz  
FIDRES 0.068610 Hz  
AQ 7.2877645 sec  
RG 1290.2  
DM 111.200 usec  
DE 158.64 usec  
TE 300.0 K

D1 1.60000002 sec  
MCREST 0.00000000 sec  
MCWRK 0.01500000 sec

==== CHANNEL f1 =====  
NUC1 1H  
P1 11.00 usec  
PL1 0.00 dB  
SFO1 300.1319508 MHz

F2 - Processing parameters  
SI 32768  
SF 300.1300063 MHz  
WDW EM  
SSB 0  
LB 0.30 Hz  
GB 0  
PC 1.00

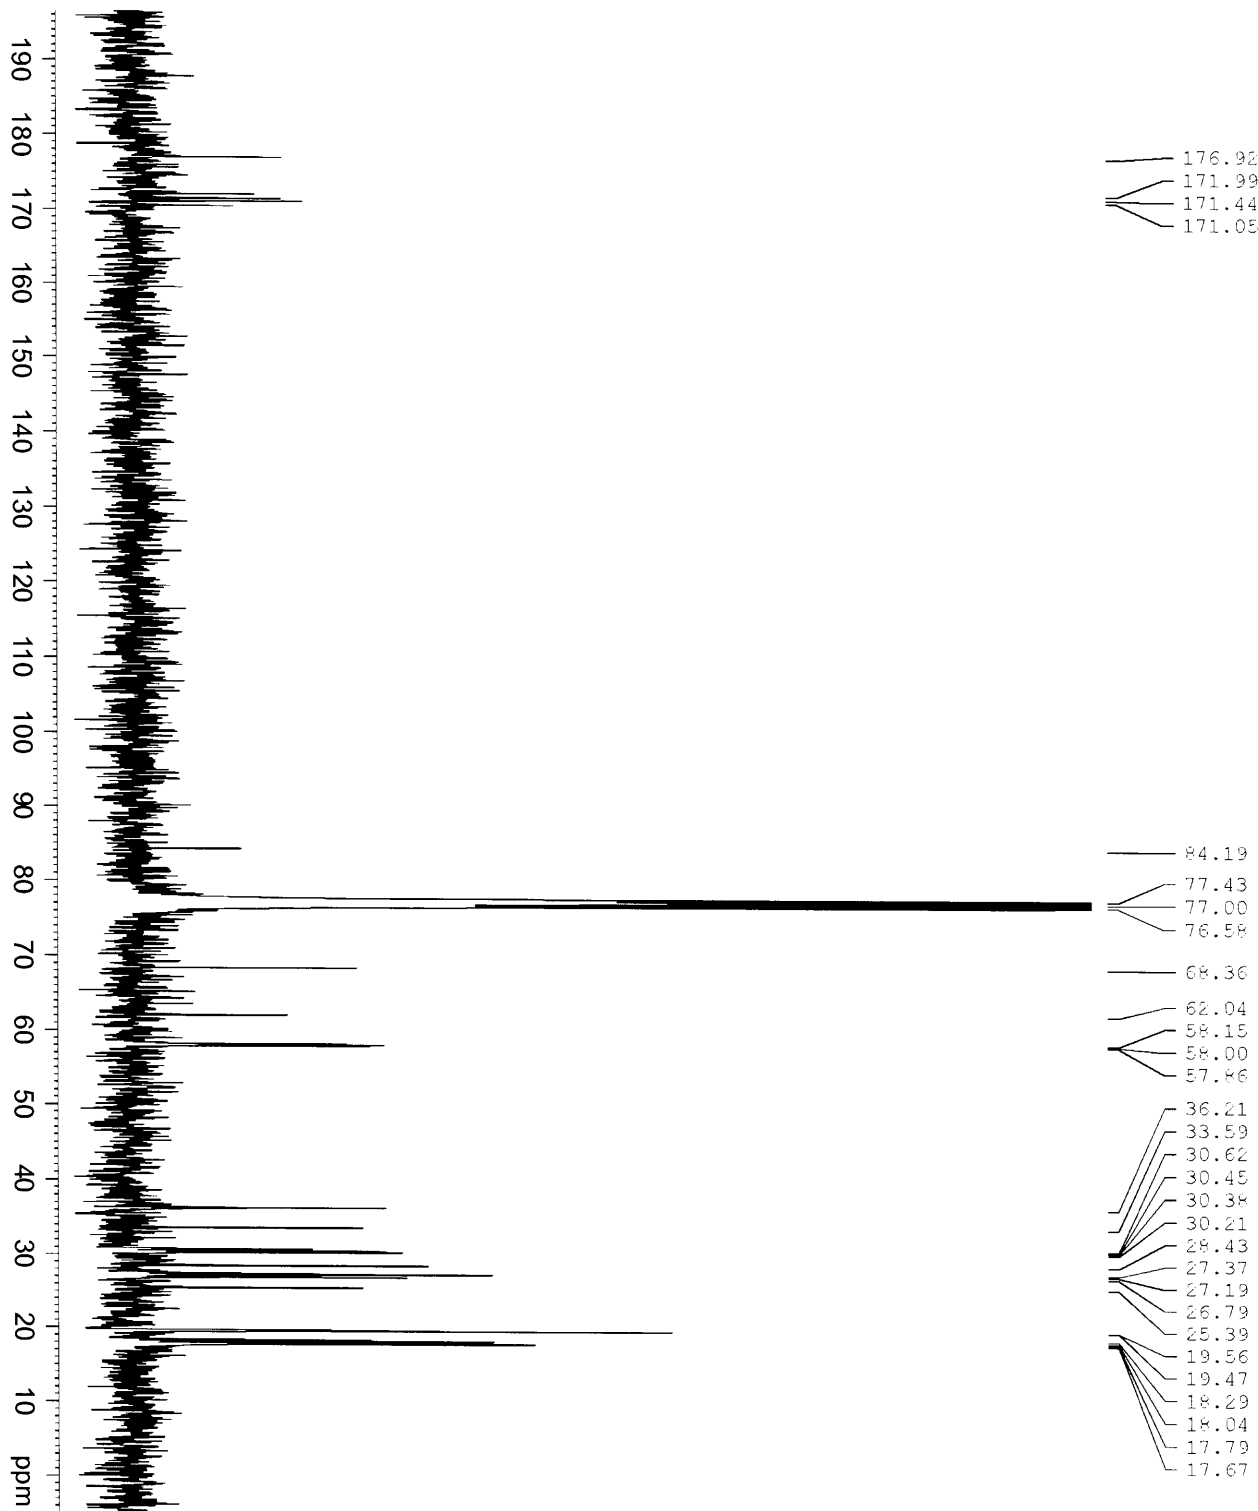

176.92  
171.99  
171.44  
171.05

84.19  
77.43  
77.00  
76.58  
68.36  
62.04  
58.15  
58.00  
57.86  
36.21  
33.59  
30.62  
30.45  
30.38  
30.21  
28.43  
27.37  
27.19  
26.79  
25.39  
19.56  
19.47  
18.29  
17.04  
17.79  
17.67

Current Data Parameters  
NAME 1455G9  
EXPNO 105  
PROCNO 1

F2 - Acquisition Parameters  
Date\_ 20041021  
Time 6.17

INSTRUM spect  
PROBHD 5 mm BBO BB/ZH  
PULPROG zgpg30  
TD 65536  
SOLVENT CDCl3  
NS 5120  
DS 8  
SWH 22727.273 Hz  
FIDRES 0.346791 Hz  
AQ 1.4418640 sec  
RG 1625.5  
DM 22.000 usec  
DE 6.00 usec  
TE 300.0 K

==== CHANNEL f1 =====  
NUC1 13C  
P1 8.95 usec  
PL1 0.00 dB  
SFO1 75.4783145 MHz  
===== CHANNEL f2 =====  
CPDPRG2 waltz16  
NUC2 1H  
PCPD2 85.00 usec  
PL2 0.00 dB  
PL12 19.00 dB  
PL13 19.00 dB  
SFO2 300.1312005 MHz

F2 - Processing parameters  
SI 32768  
SF 75.4677485 MHz  
WDW EM  
SSB 0  
LB 3.00 Hz  
GB 0  
PC 1.40

S8. <sup>13</sup>C NMR Spectrum for Dragonamide B (4) in CDCl<sub>3</sub> (75 MHz)

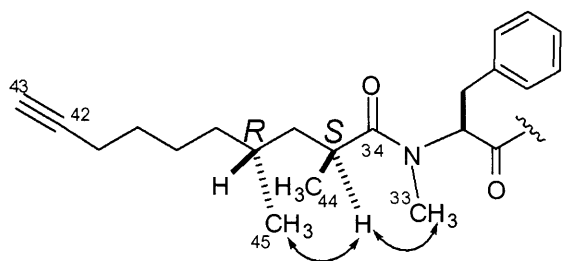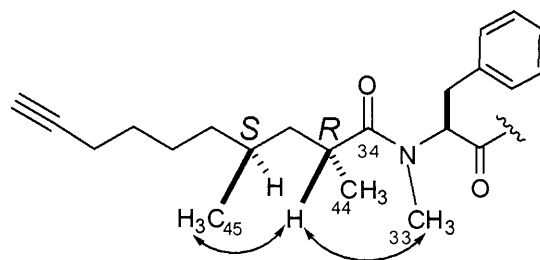

**S9.** Two potential diastereomers for the 2,4-dimethyldecynoic acid units in carmabin A (**1**). The ROESY correlations observed (represented by double-headed arrows) are consistent with either structure.

**S10. Table.**  $^{13}\text{C}$  and  $^1\text{H}$  NMR Data in  $\text{CDCl}_3$  for Dragonamide A (3).<sup>a</sup>

| dragonamide A (3) |          |                             |                                   |
|-------------------|----------|-----------------------------|-----------------------------------|
| unit <sup>b</sup> | position | $\delta_{\text{C}}$ , mult. | $\delta_{\text{H}}$ (J in Hz)     |
| NH <sub>2</sub>   | 1        | -                           | 5.99, br s                        |
| N-MePhe           | 2        | 171.8, qC                   | -                                 |
|                   | 3        | 56.3, CH                    | 5.56, dd (11, 5)                  |
|                   | 4        | N                           | -                                 |
|                   | 5        | 33.2, CH <sub>2</sub>       | 3.00, dd (ob)<br>3.25, dd (15, 5) |
|                   | 6        | 136.7, qC                   | -                                 |
|                   | 7        | 128.6, CH                   | 7.16, m                           |
|                   | 8        | 128.7, CH                   | 7.29, m                           |
|                   | 9        | 127.03 / 126.97, CH         | 7.25, m                           |
|                   | 10       | 128.7, CH                   | 7.29, m                           |
|                   | 11       | 128.6, CH                   | 7.16, m                           |
|                   | 12       | 30.7, CH <sub>3</sub>       | 2.93, m                           |
| N-Me Val-1        | 13       | 171.3, qC                   | -                                 |
|                   | 14       | 58.4 / 58.3, CH             | 5.08, d (11)                      |
|                   | 15       | N                           | -                                 |
|                   | 16       | 27.1, CH                    | 2.29, m                           |
|                   | 17       | 20.0, CH <sub>3</sub>       | 0.88, d (6)                       |
|                   | 18       | 17.4, CH <sub>3</sub>       | 0.66, d (7)                       |
|                   | 19       | 29.7, CH <sub>3</sub>       | 2.43, s                           |
| N-Me Val-2        | 20       | 169.7, qC                   | -                                 |
|                   | 21       | 57.9, CH                    | 4.94, d (11)                      |
|                   | 22       | N                           | -                                 |
|                   | 23       | 27.1, CH                    | 2.25, m                           |
|                   | 24       | 19.7, CH <sub>3</sub>       | 0.71, d (7)                       |
|                   | 25       | 17.6, CH <sub>3</sub>       | 0.70, d (6)                       |
|                   | 26       | 30.4, CH <sub>3</sub>       | 2.94, s                           |
| N-Me Val-3        | 27       | 170.8, qC                   | -                                 |
|                   | 28       | 57.9, CH                    | 5.18, d (11)                      |
|                   | 29       | N                           | -                                 |
|                   | 30       | 27.0, qCH                   | 2.33, m                           |
|                   | 31       | 19.5, CH <sub>3</sub>       | 0.82, d (ob)                      |
|                   | 32       | 17.6, CH <sub>3</sub>       | 0.80, d (ob)                      |
|                   | 33       | 30.2, CH <sub>3</sub>       | 2.97, s                           |
| Moya              | 34       | 176.9 / 176.8, qC           | -                                 |
|                   | 35       | 36.2, CH                    | 2.70, m                           |
|                   | 36       | 33.6, CH <sub>2</sub>       | 1.69, m                           |
|                   | 37       | 26.8, CH <sub>2</sub>       | 1.33, m                           |
|                   | 38       | 28.4, CH <sub>2</sub>       | 1.49, m                           |
|                   | 39       | 18.3, CH <sub>2</sub>       | 2.16, dt (7, 2)                   |
|                   | 40       | 84.2, qC                    | -                                 |
|                   | 41       | 68.4, CH                    | 1.93, t (2)                       |
|                   | 42       | 17.95, CH <sub>3</sub>      | 1.11, d (7)                       |

<sup>a</sup>Measured at 100 MHz ( $^{13}\text{C}$ ) and 400 MHz ( $^1\text{H}$ ).<sup>b</sup>Moya = 2-methyloct-7-ynoic acid. ob = obscured.
